# Supplementary material for: Porous ZnO/Co3O4 heteronanostructures derived from nano coordination polymers for enhanced gas sorption and visible light photocatalytic applications
Source: Royal Society of Chemistry journal article supplement (doi:10.1039/c5ra07799k), 2015-01-01
Supplement: c5ra07799k1.pdf [file c5ra07799k1.pdf]

## Supporting Information

### **Porous ZnO-Co<sub>3</sub>O<sub>4</sub> Heteronanostructures Derived from Nano Coordination Polymers for Enhanced Gas Sorption and Visible Light Photocatalytic Applications**

*Md.Rakibuddin and Rajakumar Ananthkrishnan\**

*Department of Chemistry, Indian Institute of Technology, Kharagpur 721 302, India.*

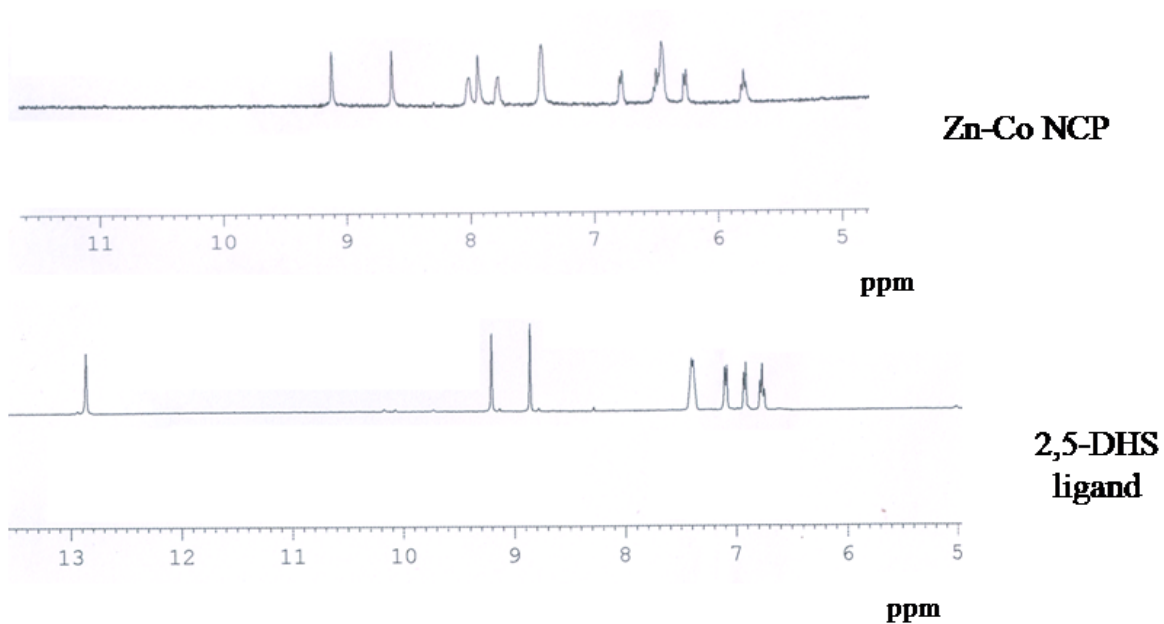

Fig.S1 <sup>1</sup>H NMR (400 MHz) spectra of the synthesized Zn-Co NCP and precursor DHS ligand digesting in DMSO-d<sub>6</sub> solvent.

The <sup>1</sup>H NMR studies of the Zn-Co NCP 61 and the ligand 2,5-DHS were investigated by digesting the particles in DMSO-d<sub>6</sub>. The <sup>1</sup>H NMR of the 2,5-DHS shows the peaks of the phenolic –OH group at 12.9 and 9.25 ppm, which are completely vanished in the 2,5-NCP due to coordination of –OH group to the Zn<sup>+2</sup>. The peaks of the two azomethine hydrogen of the ligand in the NCPs appeared at 8.6 and 9.1 ppm. The aromatic hydrogen of BDC<sup>2-</sup> incorporated into the NCP appeared between 7.7-8.0 ppm indicating formation of the NCP.<sup>1</sup>

1. S. Jung, W. Cho, H. J. Lee and M. Oh, *Angew. Chem. Int. Ed.* 2009, **48**, 1459-1462.

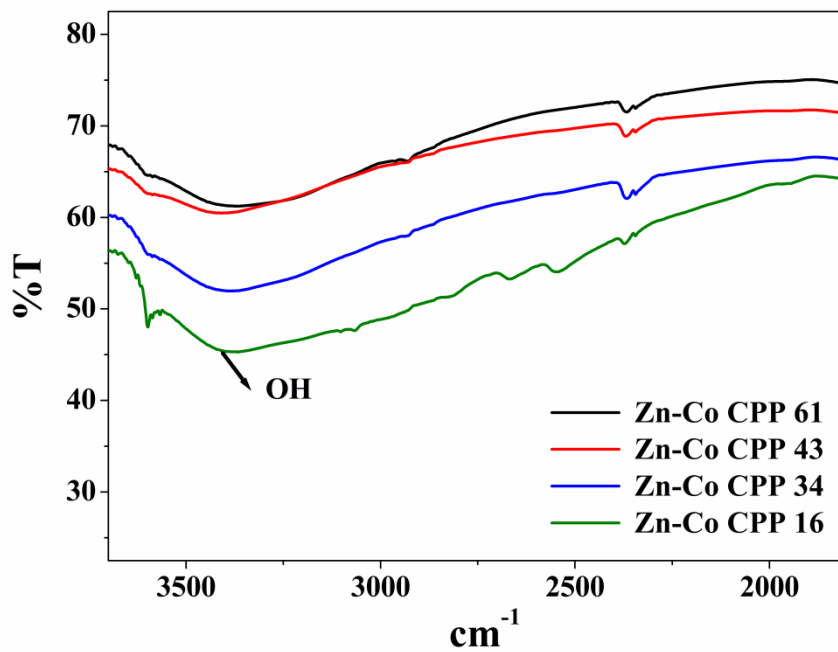

Fig.S2 FT-IR spectra of the prepared NCPs at higher wavenumber (1800-3700  $\text{cm}^{-1}$ ).

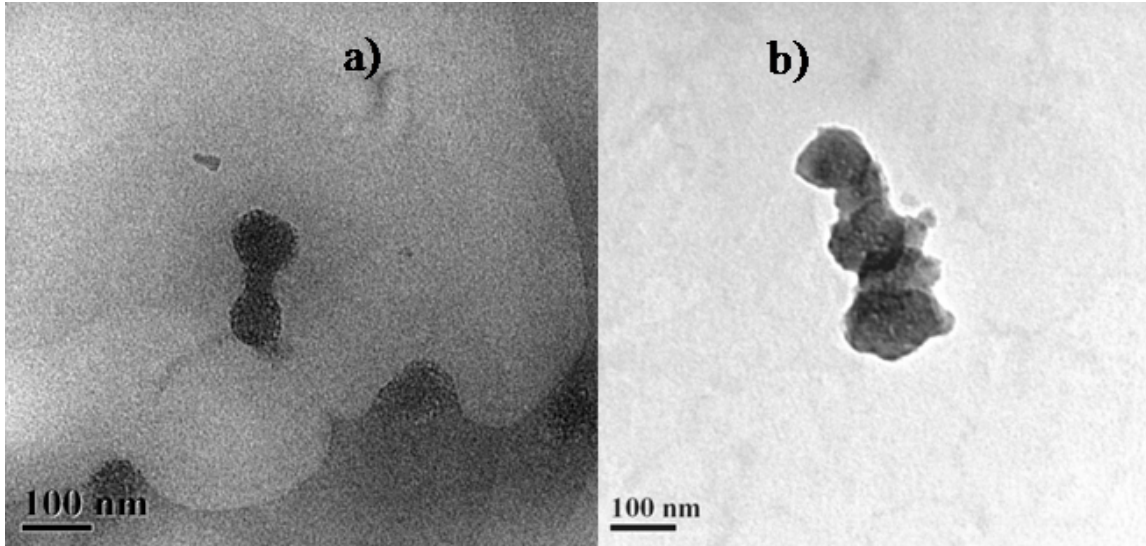

Fig.S3 TEM image of the synthesized a) Zn-Co NCP 43 and b) Zn-Co NCP 16.

The TEM image of the hexagonal lump shaped Zn-Co NCP showing average size about 70-100 nm depending on different ratios.

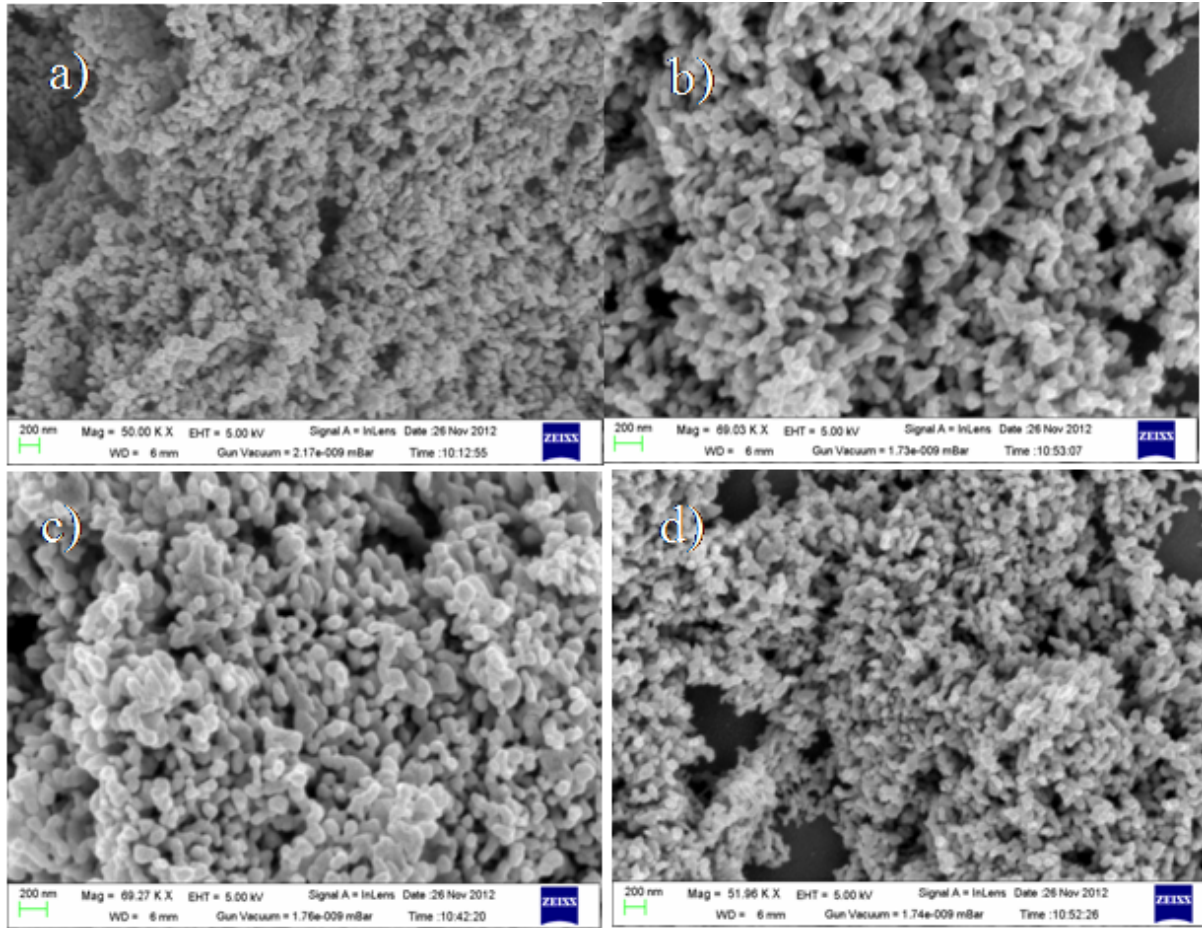

Fig.S4. FESEM image of the obtained ZnO-Co<sub>3</sub>O<sub>4</sub> heteronanostructures: a) ZnO-Co<sub>3</sub>O<sub>4</sub> 61; b) ZnO-Co<sub>3</sub>O<sub>4</sub> 43, c) ZnO-Co<sub>3</sub>O<sub>4</sub> 34 and d) ZnO-Co<sub>3</sub>O<sub>4</sub> 16.

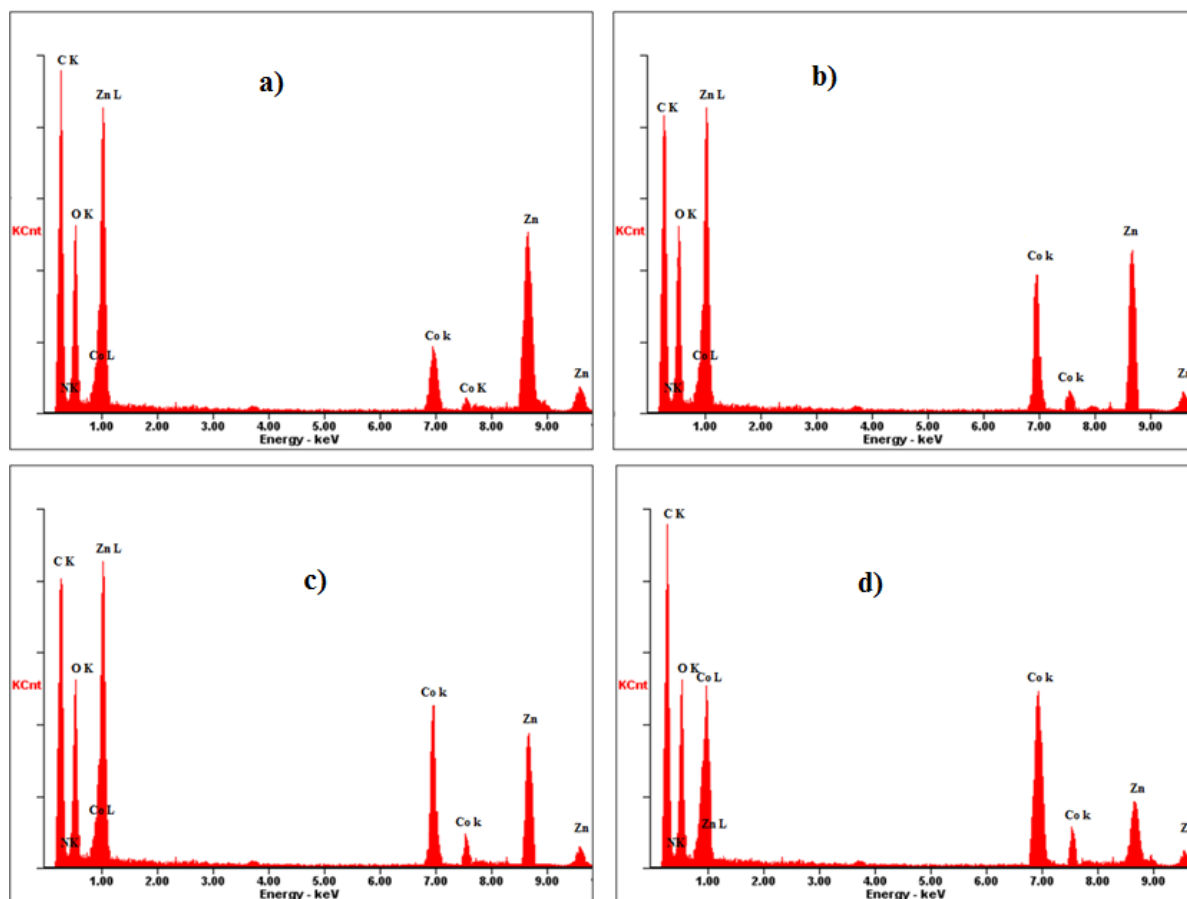

Fig.S5 EDX spectrum of the synthesized Zn-Co NCPs: a) Zn-Co NCP 61, b) Zn-Co NCP 43, c) Zn-Co NCP 34 and d) Zn-Co NCP 16.

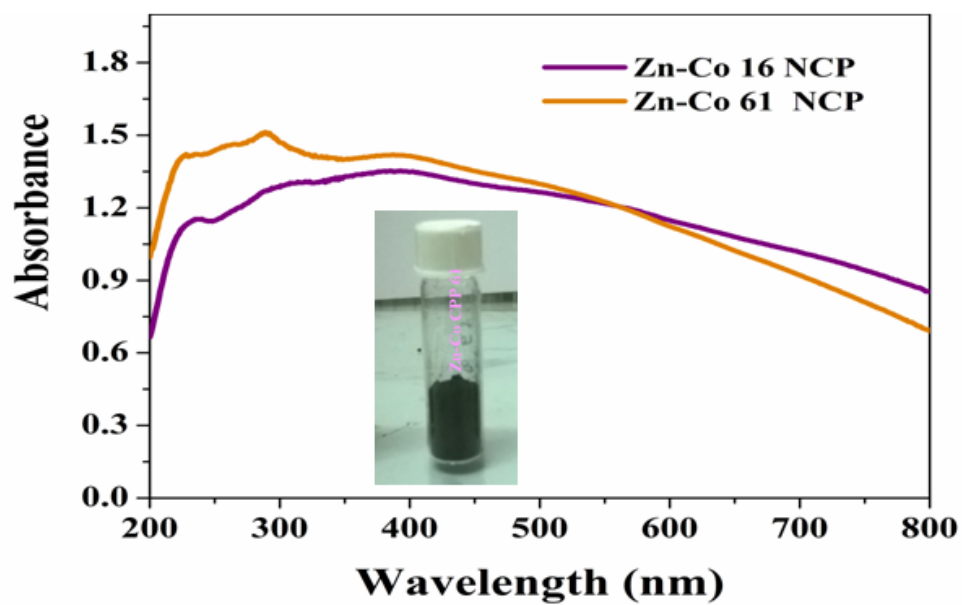

Fig.S6 DRS spectra of the Zn-Co NCPs.

The DRS spectra of the NCPs show broad visible light absorption, and hence the color of the NCPs appears to be black from the two initial colorless precursors.

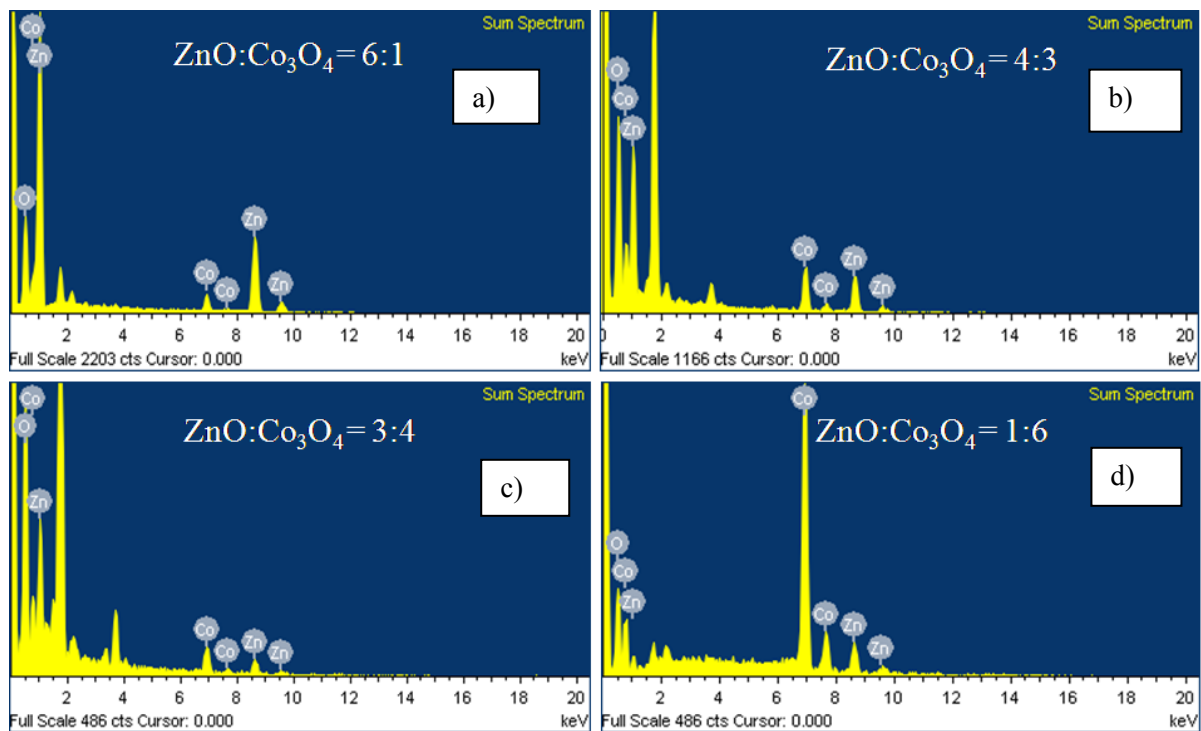

Fig.S7 EDX analysis of the prepared ZnO-Co<sub>3</sub>O<sub>4</sub> heterostructures after calcinations of the Zn-Co NCPs at 500 °C, a) ZnO-Co<sub>3</sub>O<sub>4</sub> 6:1, b) ZnO-Co<sub>3</sub>O<sub>4</sub> 4:3, c) ZnO-Co<sub>3</sub>O<sub>4</sub> 3:4 and d) ZnO-Co<sub>3</sub>O<sub>4</sub> 1:6.

The EDX analysis shows the presence of Zn, Co and O in the ZnO-Co<sub>3</sub>O<sub>4</sub> heteronanostructures. The peak intensity of the Zn and Co is increased or decreased upon changing their ratios.



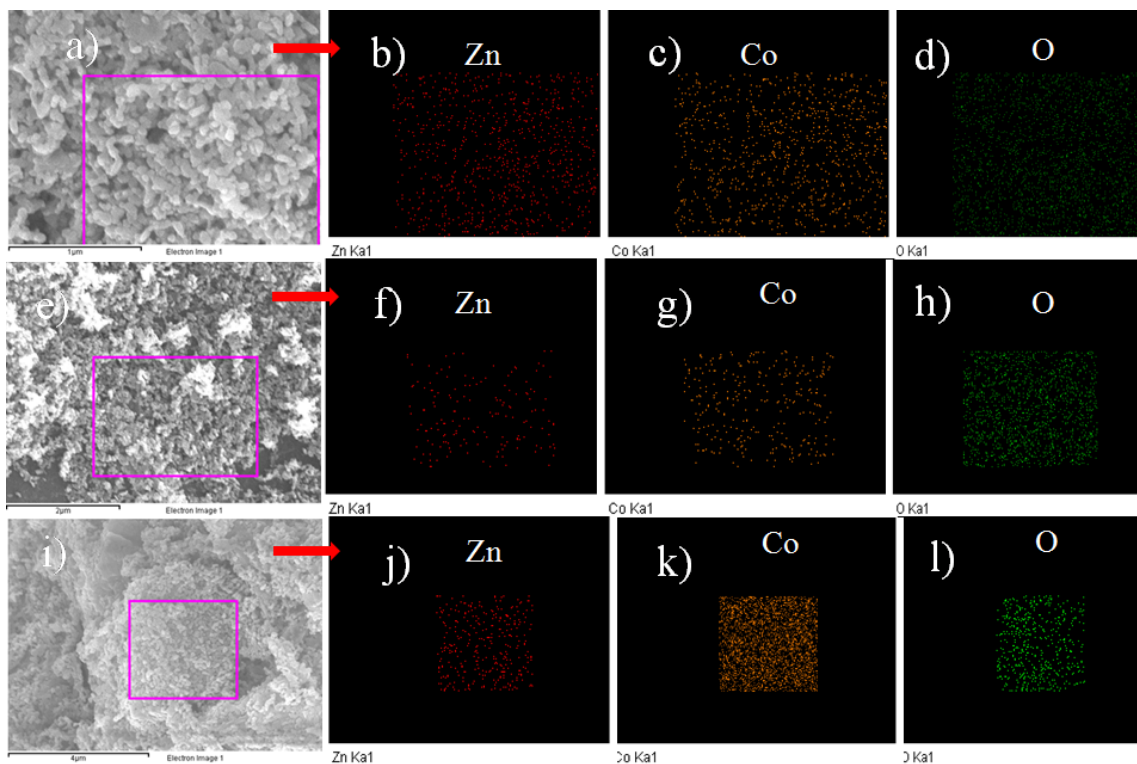

Fig.S8. Elemental area mapping of the Zn, Co, O of the a,b,c,d)  $\text{ZnO-Co}_3\text{O}_4$  43; e,f,g,h)  $\text{ZnO-Co}_3\text{O}_4$  34 and i,j,k,l)  $\text{ZnO-Co}_3\text{O}_4$  16 heterostructures showing the elemental distribution in the respective samples from the FESEM image.

Elemental area mapping is obtained from the corresponding FESEM image of a particular area showing the change in concentration of Zn/ Co upon changing their ratios in the respective nanostructures. Here, Zn (f, j) is in low concentration than Co (g, k) in the  $\text{ZnO-Co}_3\text{O}_4$  34 and  $\text{ZnO-Co}_3\text{O}_4$  16 heterostructures.

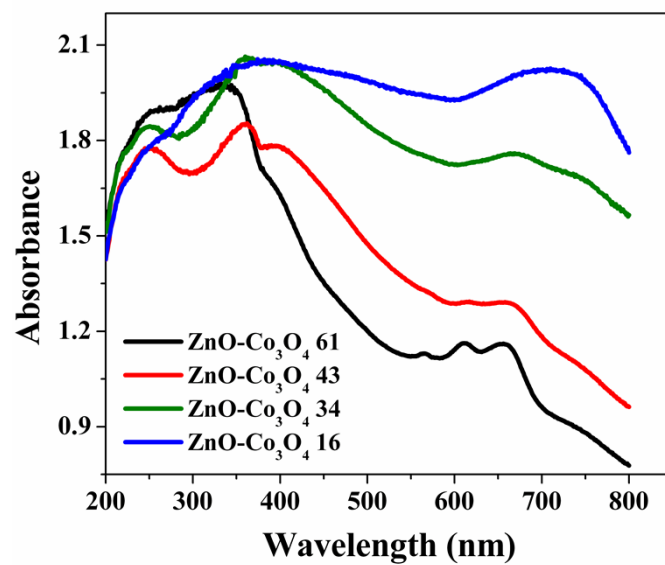

Fig.S9 Diffuse Reflectance Spectra of the synthesized ZnO-Co<sub>3</sub>O<sub>4</sub> heteronanostructures.

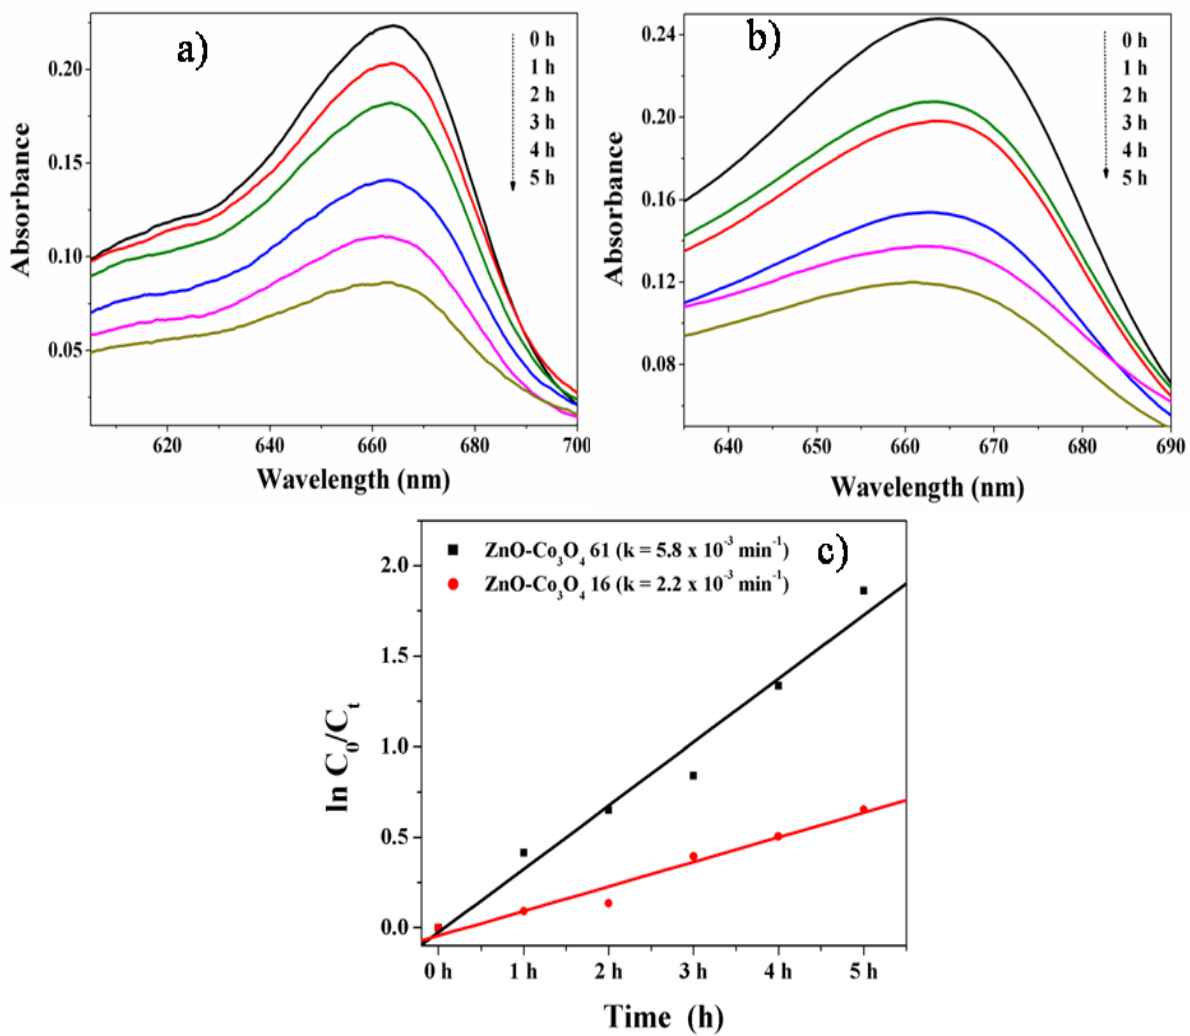

Fig.S10 UV-visible absorption spectra of the degradation of MB dye in presence of a) ZnO-Co<sub>3</sub>O<sub>4</sub> 43, b) ZnO-Co<sub>3</sub>O<sub>4</sub> 16 and c)  $\ln C_0/C_t$  vs time plot for determination of rate constant of the catalyst.

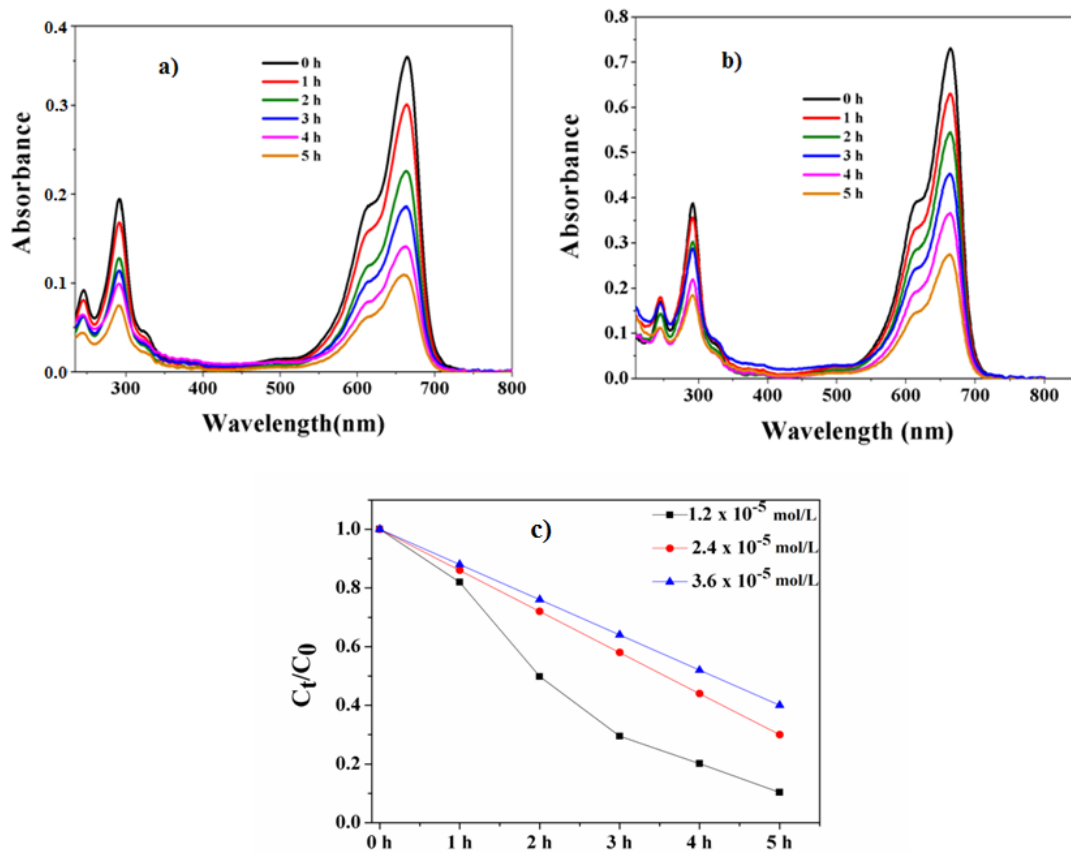

Fig.S11. Effect of concentrations for degradation of MB in presence of ZnO-Co<sub>3</sub>O<sub>4</sub> 61 catalyst; a)  $2.4 \times 10^{-5}$  mol/L, b)  $3.6 \times 10^{-5}$  mol/L and c)  $C_t/C_0$  vs time plot.

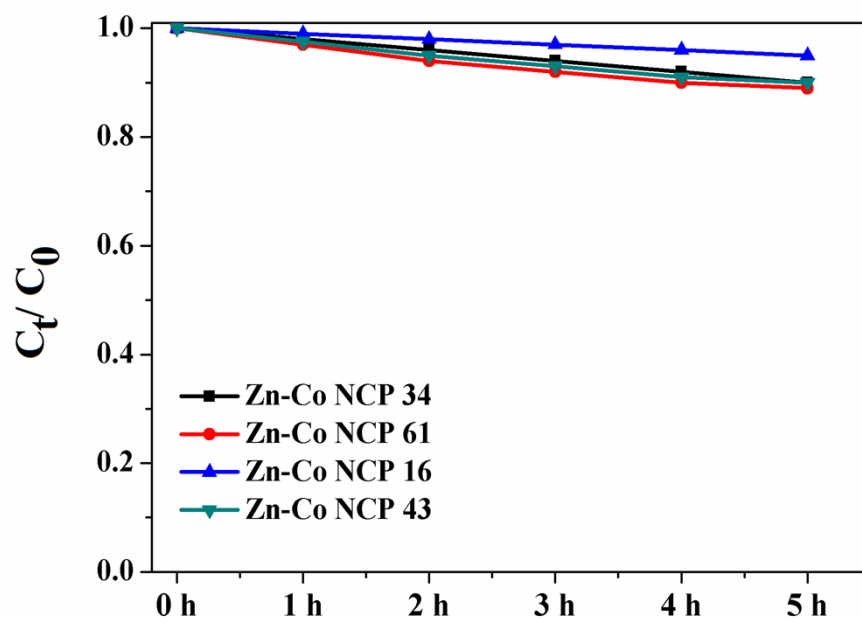

Fig.S12 Degradation kinetics of MB in presence of Zn-Co NCPs

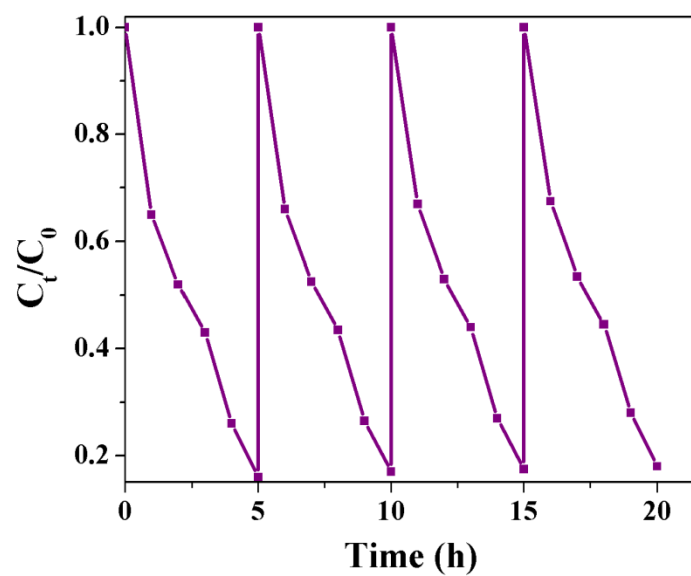

Fig.S13. Reusability study of the ZnO-Co<sub>3</sub>O<sub>4</sub> 61.

Table S1. BET surface area, pore volume and N<sub>2</sub> gas sorption capacity of the synthesized Zn-Co NCPs and corresponding ZnO-Co<sub>3</sub>O<sub>4</sub> heteronanostructures

| <b>Sample name</b>                        | <b>Surface area (m<sup>2</sup>/g)</b> | <b>Pore volume (cc/g)</b> | <b>N<sub>2</sub> gas uptake capacity (cc/g)</b> |
|-------------------------------------------|---------------------------------------|---------------------------|-------------------------------------------------|
| <b>Zn-Co NCP 61</b>                       | 225.3                                 | 0.123                     | 130                                             |
| <b>Zn-Co NCP 43</b>                       | 202.4                                 | 0.103                     | 110                                             |
| <b>Zn-Co NCP 16</b>                       | 189.3                                 | 0.272                     | 295                                             |
| <b>ZnO-Co<sub>3</sub>O<sub>4</sub> 61</b> | 140.4                                 | 0.552                     | 645                                             |
| <b>ZnO-Co<sub>3</sub>O<sub>4</sub> 43</b> | 110.8                                 | 0.366                     | 355                                             |
| <b>ZnO-Co<sub>3</sub>O<sub>4</sub> 16</b> | 80.5                                  | 0.355                     | 345                                             |
